# Supplementary material for: Removal of Synthetic Azo Dye Using Bimetallic Nickel-Iron Nanoparticles
Source: Hindawi journal article supplement (doi:10.1155/2019/9807605), 2019-03-19
Supplement: f1 [file 9807605.f1.pdf]

# Removal of Synthetic Azo Dye using Bimetallic Nickel-Iron Nanoparticles<sup>1</sup>

Shelby L. Foster<sup>1</sup>, Katie Estoque<sup>2</sup>, Michael Voecks<sup>3</sup>, Nikki Rentz<sup>4</sup>, Lauren F. Greenlee<sup>1</sup>

<sup>1</sup>Ralph E. Martin Department of Chemical Engineering, University of Arkansas, Fayetteville AR

<sup>2</sup>Department of Chemistry and Chemical Biology, Cornell University, Ithaca NY

<sup>3</sup>Department of Computer Science, University of Colorado Boulder, Boulder CO

<sup>4</sup>National Institute of Standards and Technology, Boulder CO

Correspondence should be addressed to Lauren F. Greenlee; greenlee@uark.edu

## Supplemental Information

**Table S1:** ICP results for nickel to iron molar ratio for fresh nanoparticles and stored nanoparticles over a span of 3 weeks for both core shell (CS) and alloy morphologies.

| 0 Weeks      |      |       | 1 Week       |      |       |
|--------------|------|-------|--------------|------|-------|
| Target Ratio | CS   | Alloy | Target Ratio | CS   | Alloy |
| 1:1          | 0.57 | 1.06  | 1:1          | 0.61 | 1.15  |
| 0.5:1        | 0.40 | 0.54  | 0.5:1        | 0.43 | 0.57  |
| 0.2:1        | 0.09 | 0.20  | 0.2:1        | 0.11 | 0.23  |
| 2 Weeks      |      |       | 3 Weeks      |      |       |
| Target Ratio | CS   | Alloy | Target Ratio | CS   | Alloy |
| 1:1          | 0.51 | 1.11  | 1:1          | 0.92 | 1.10  |
| 0.5:1        | 0.38 | 0.59  | 0.5:1        | 0.40 | 0.55  |
| 0.2:1        | 0.19 | 0.23  | 0.2:1        | 0.16 | 0.21  |

---

<sup>1</sup> Contribution of NIST, an agency of the U.S. government; not subject to copyright in the United States.

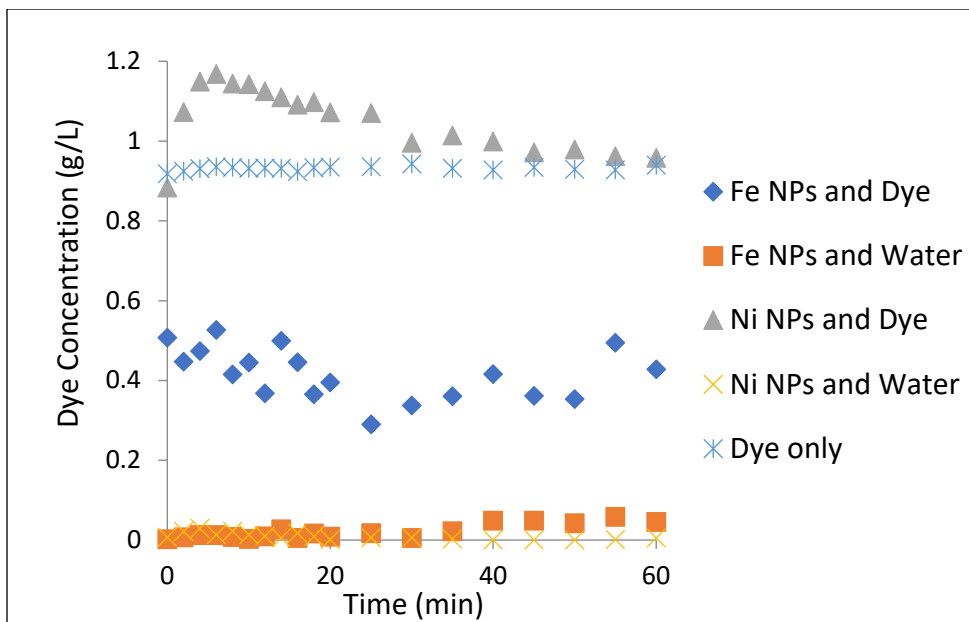

**Figure S2:** Effect of monometallic iron and nickel nanoparticles over time in water and in a 1 g/L stock dye solution.

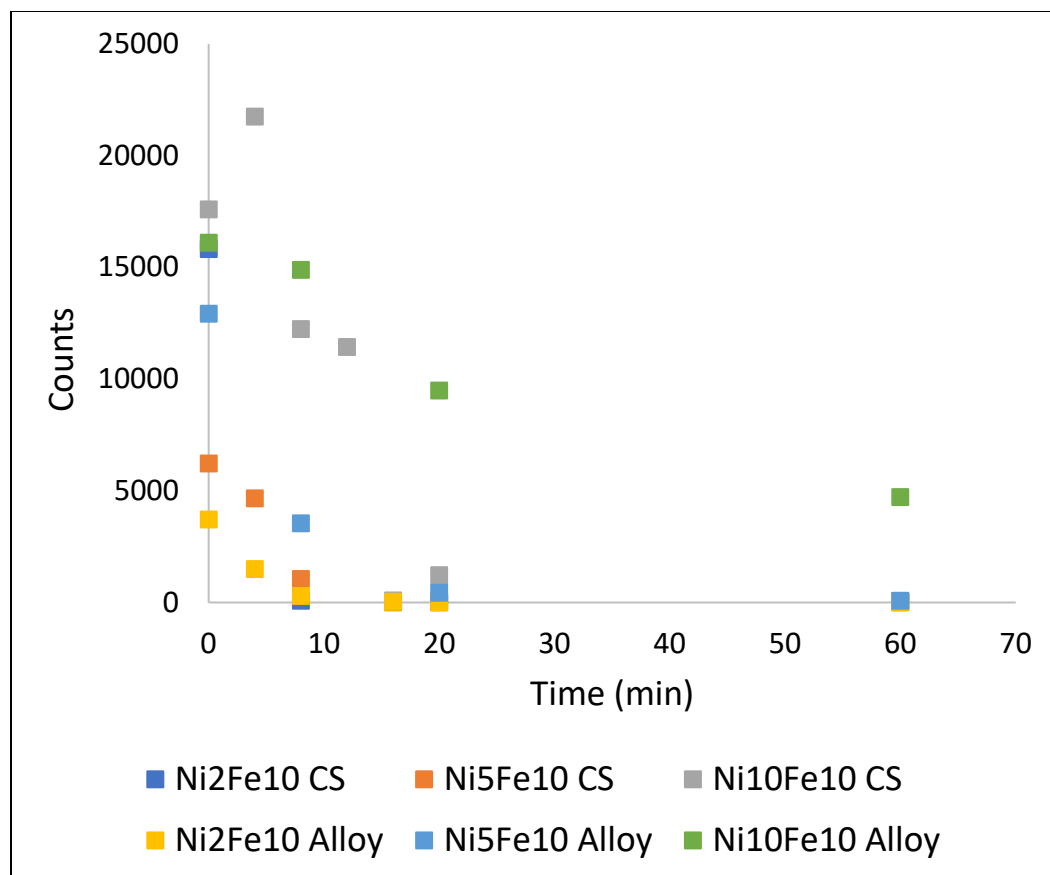

**Figure S3.** Mass spec detection of Orange G over time for all NiFe morphologies (alloy and core shell) and molar ratios (2:10, 5:10, and 10:10 NiFe).

**Table S2.** Investigation of Orange G degradation percent from mass spec data as compared to color removal from UV-vis spectrophotometry

| Nanoparticles                           | Orange G Degradation (%) <sup>*</sup> | Orange G Removal (%) <sup>**</sup> |
|-----------------------------------------|---------------------------------------|------------------------------------|
| Ni <sub>2</sub> Fe <sub>10</sub> CS     | 99.6                                  | 66.3                               |
| Ni <sub>5</sub> Fe <sub>10</sub> CS     | 99.9                                  | 89.4                               |
| Ni <sub>10</sub> Fe <sub>10</sub> CS    | 99.6                                  | 98.3                               |
| Ni <sub>2</sub> Fe <sub>10</sub> Alloy  | 99.9                                  | 97.0                               |
| Ni <sub>5</sub> Fe <sub>10</sub> Alloy  | 99.4                                  | 99.4                               |
| Ni <sub>10</sub> Fe <sub>10</sub> Alloy | 70.7                                  | 98.1                               |

<sup>\*</sup>Mass spec

<sup>\*\*</sup>UV-vis data

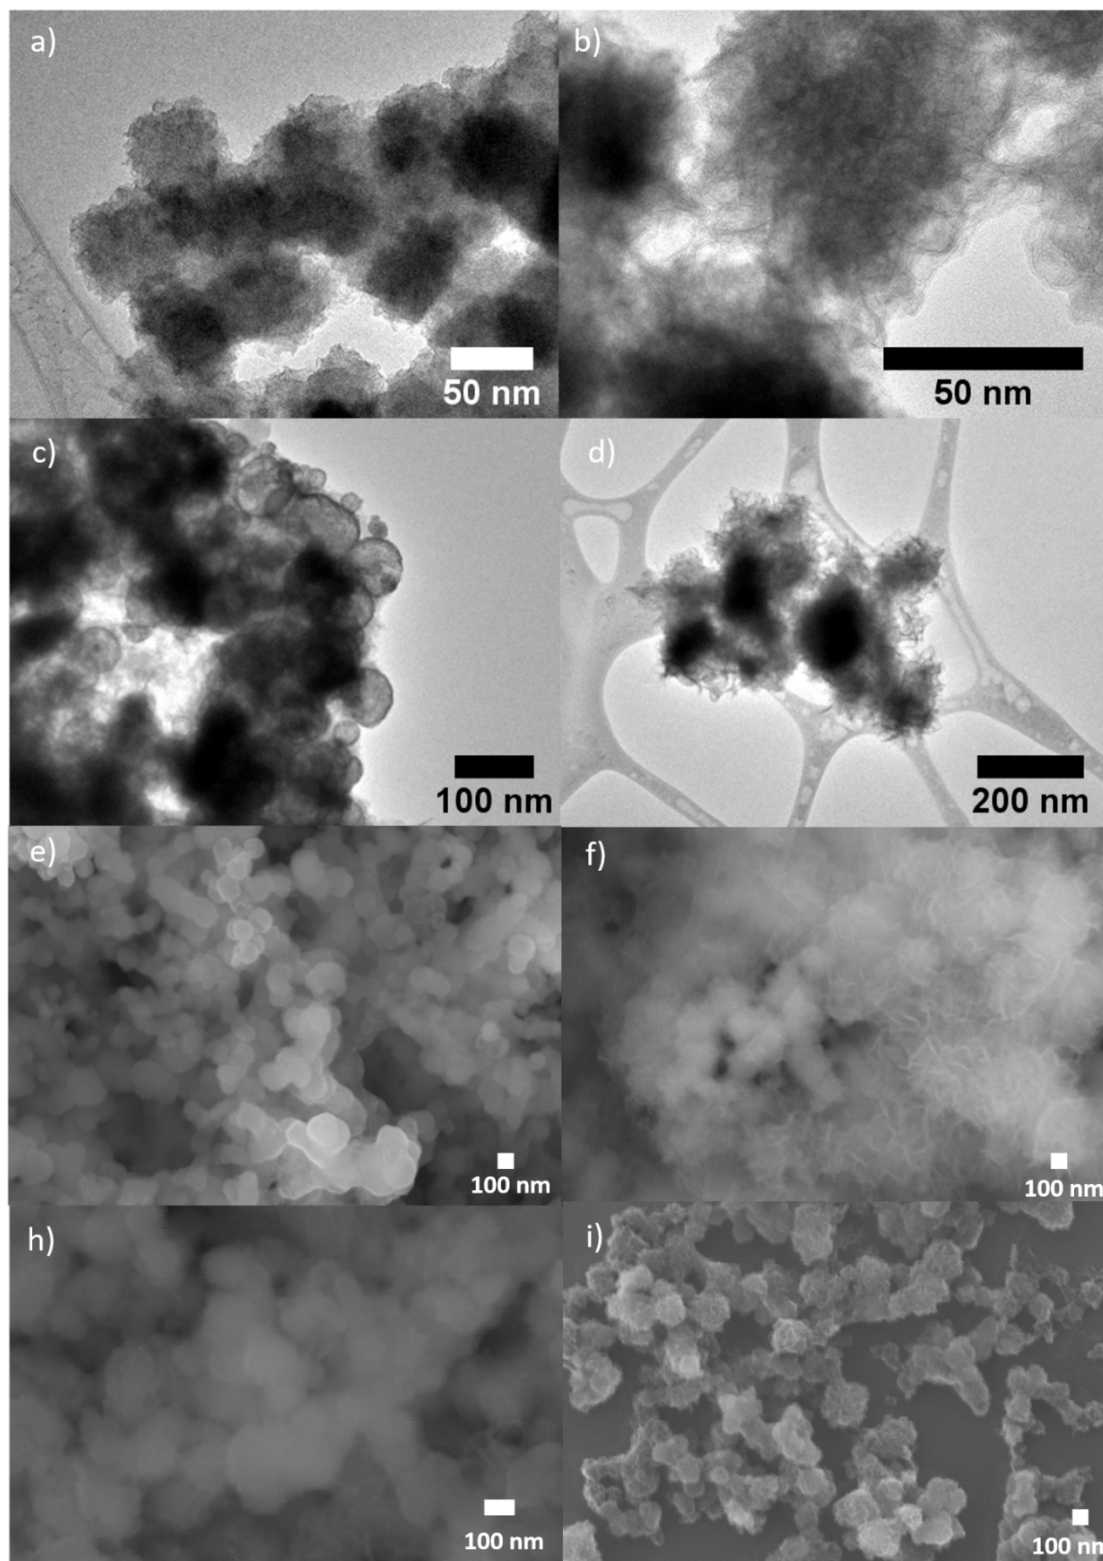

**Figure S4.** TEM images of core shell nanoparticles a)  $\text{Ni}_5\text{Fe}_{10}$  before testing, b)  $\text{Ni}_5\text{Fe}_{10}$  after testing, c)  $\text{Ni}_{10}\text{Fe}_{10}$  before testing, and d)  $\text{Ni}_{10}\text{Fe}_{10}$  after testing. SEM images of alloy nanoparticles e)  $\text{Ni}_5\text{Fe}_{10}$  before testing, f)  $\text{Ni}_5\text{Fe}_{10}$  after testing, g)  $\text{Ni}_{10}\text{Fe}_{10}$  before testing, and h)  $\text{Ni}_{10}\text{Fe}_{10}$  after testing.

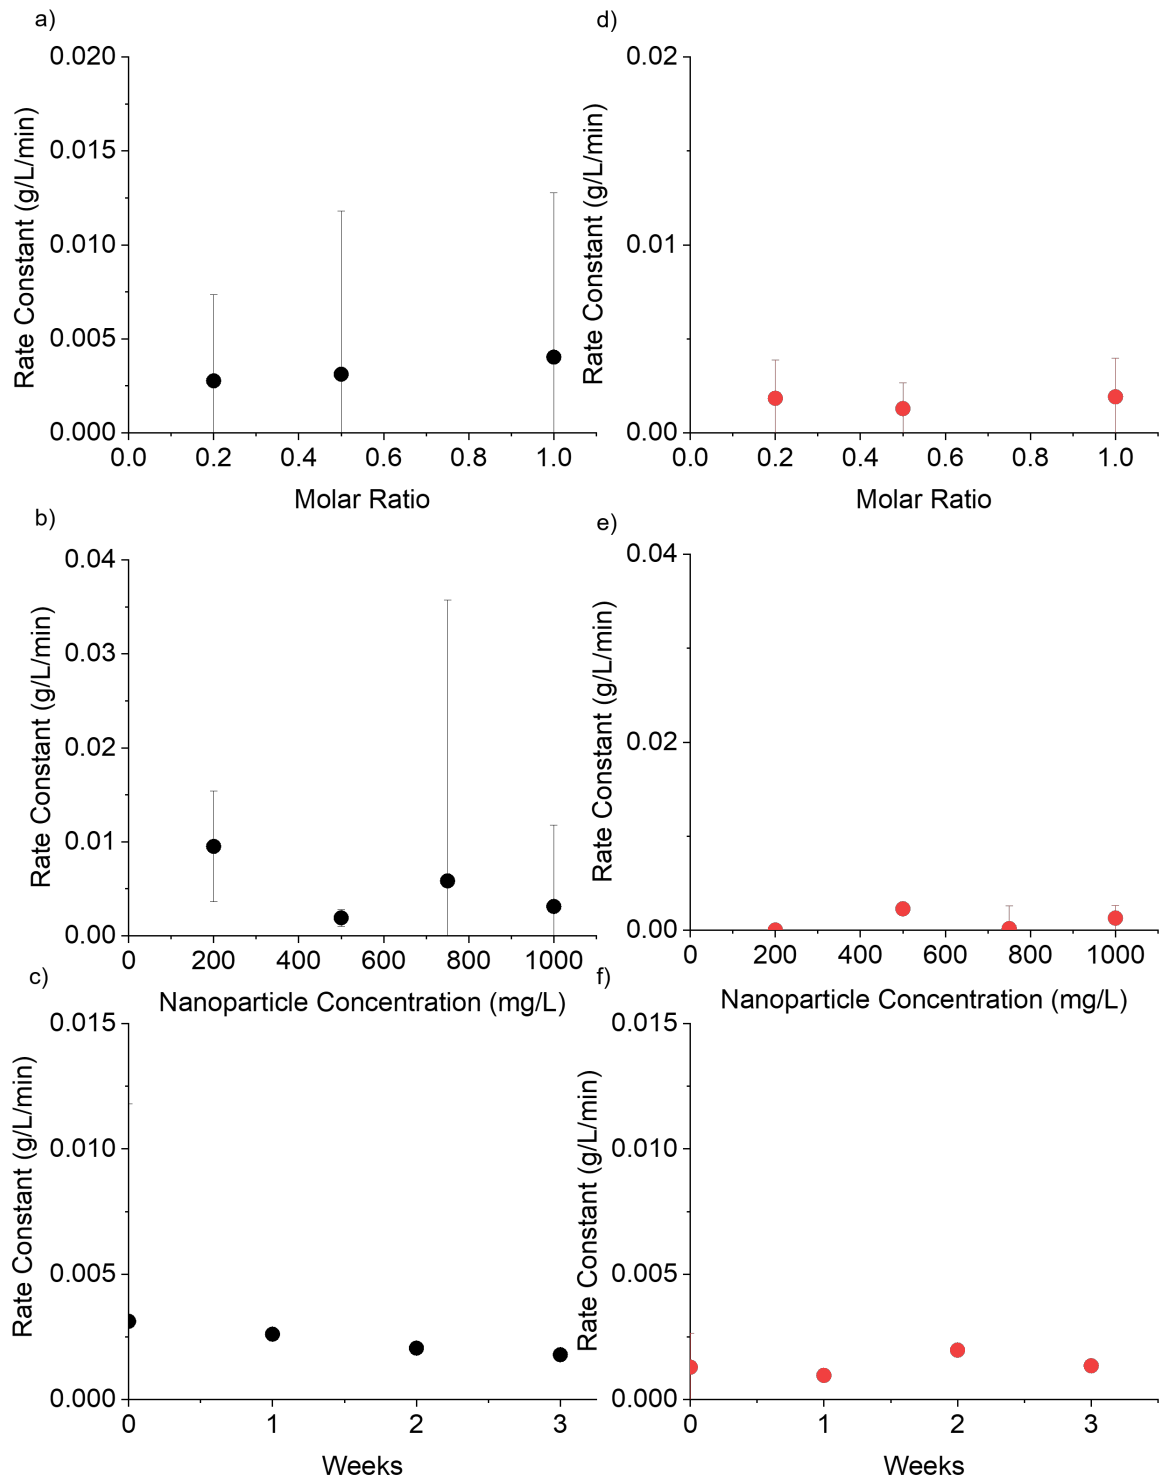

**Figure S5:** Zero order kinetic rate constants for 1000 mg/L alloy particles comparing a) molar ratio, b) particle concentration, and c) reactive shelf life of Ni<sub>5</sub>Fe<sub>10</sub> alloy particles over the last 40 minutes of experiments. Zero order kinetic rate constants for 1000 mg/L core shell particles comparing d) molar ratio, e) particle concentration, and f) reactive shelf life of Ni<sub>5</sub>Fe<sub>10</sub> coreshell particles over the last 40 minutes of experiments.
